# Supplementary material for: Thermal conversion of a pyridine solvate to a de-solvate facilitated by rearrangement of chalcogen bonds. The solvate and non-solvate structures of N-(2-nitro-4-(3-oxobenzo[d][1,2]selenazol-2(3H)-yl)phenyl)picolinamide
Source: Royal Society of Chemistry journal article supplement (doi:10.1039/d0ce00662a), 2020-01-01

**Thermal conversion of a pyridine solvate to a de-solvate facilitated by rearrangement of chalcogen bonds. The solvate and non-solvate structures of N-(2-nitro-4-(3-oxobenzo[d][1,2]selenazol-2(3H)-yl)phenyl)picolinamide**

Thomas Fellowes,<sup>a,b</sup> Martin P. Van Koeverden,<sup>a</sup> Jonathan M White\*<sup>a,b</sup>

a) School of Chemistry, The University of Melbourne, Parkville 3010 Melbourne

b) Bio-21 Institute, The University of Melbourne, 30 Flemington road Parkville 3010 Melbourne

**Supporting information.**

|                                                                                        |        |
|----------------------------------------------------------------------------------------|--------|
| NMR and ESI spectra for compound <b>5</b>                                              | Page 2 |
| NMR data and spectra for compound <b>1</b>                                             | Page 3 |
| SUPP-Figure 1 Powder pattern for <b>1</b> .pyridine at 100K                            | Page 4 |
| SUPP-Figure 2 Powder pattern for <b>1</b> .pyridine at 273K                            | Page 4 |
| SUPP-Figure 3 Powder pattern for <b>1</b> .pyridine at 350K                            | Page 4 |
| SUPP-Figure 4 Powder pattern for <b>1</b> .pyridine at 360K                            | Page 4 |
| SUPP-Figure 5 Powder pattern for <b>1</b> .pyridine at 360K after 10 minutes           | Page 5 |
| SUPP-Figure 6 Powder pattern for <b>1</b> .pyridine at 370K                            | Page 5 |
| SUPP-Figure 7 Powder pattern for <b>1</b> .pyridine at 390K                            | Page 5 |
| SUPP-Figure 8 Powder pattern after heating a single crystal of <b>1</b> .pyridine 390K | Page 5 |
| SUPP-Figure 9 Calculated powder patterns for <b>1</b> .pyridine and <b>1</b> (ex.DMF)  | Page 6 |
| SUPP-Figure 10 Snap shot from single crystal of <b>1</b> .Pyridine heated to 90°C      | Page 6 |

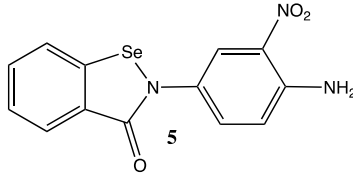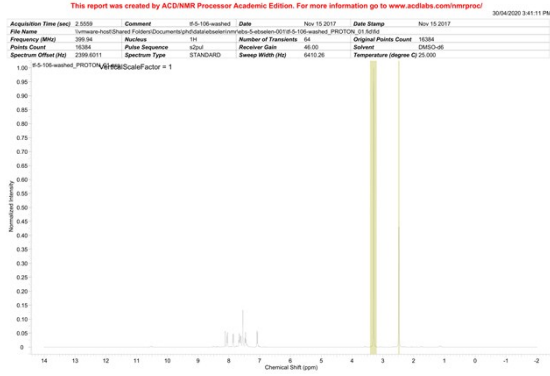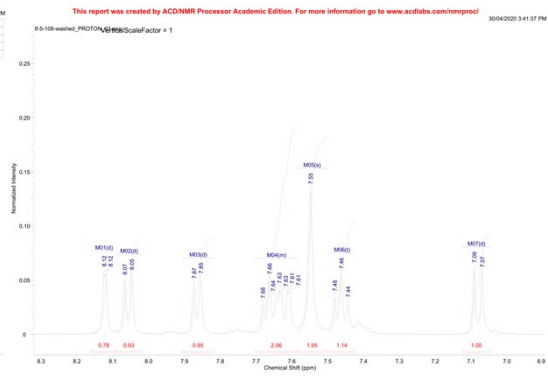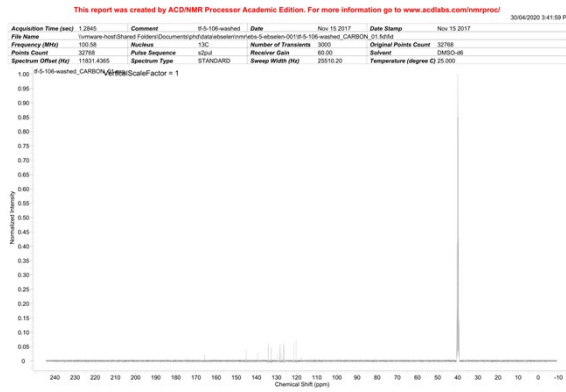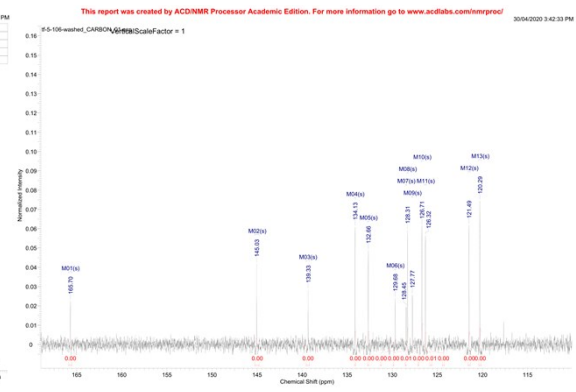

TF-5-106-THF-INSOL\_#37-39 RT: 0.34-0.36 AV: 3 NL: 7.45E8  
T: FTMS - p ESI Full lock ms [100.0000-1000.0000]

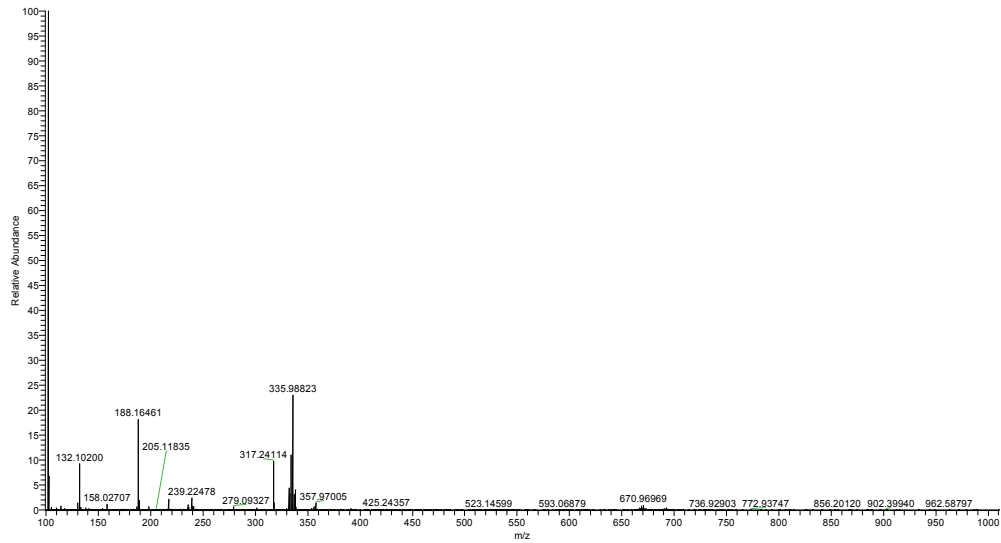

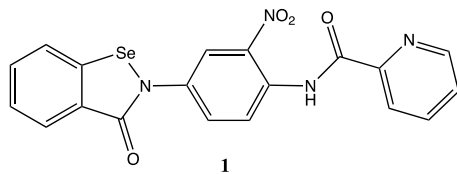

This report was created by ACD/NMR Processor Academic Edition. For more information go to www.acdlabs.com/nmrpro/

|                        |                                                                                      |                |                |                     |             |                        |                     |
|------------------------|--------------------------------------------------------------------------------------|----------------|----------------|---------------------|-------------|------------------------|---------------------|
| Acquisition Time (sec) | 4.0000                                                                               | Date           | Dec. 5 2017    | Date Stamp          | Dec. 5 2017 | 30/04/2020 4:01:03 PM  |                     |
| File Name              | Z:\nmr\data\Shared\Folders\Documents\0201\data\acdlabs\py\01716-0-120-acrylyl-th.svd |                |                |                     |             |                        |                     |
| Frequency (MHz)        | 400.63                                                                               | Nucleus        | <sup>1</sup> H | Number of Transmits | 48          | Original Points Count  | 40000               |
| Pulse Count            | 95008                                                                                | Pulse Sequence | zgpg           | Receiver Gain       | 90.00       | Solvent                | DMSO-d <sub>6</sub> |
| Spectrum Offset (MHz)  | 2098.1089                                                                            | Spectrum Type  | STANDARD       | Sweep Width (MHz)   | 10000.00    | Temperature (Degree C) | 25.000              |

#-0-120-acrylyl-th.svd     VerticalScaleFactor = 1

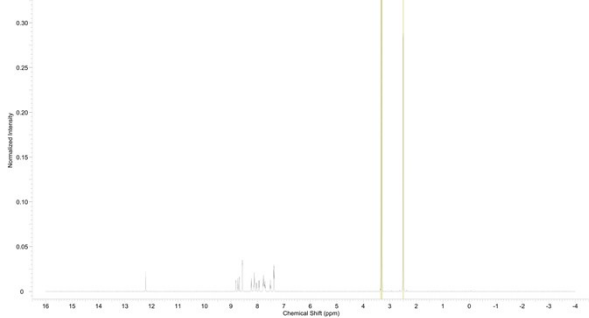

This report was created by ACD/NMR Processor Academic Edition. For more information go to www.acdlabs.com/nmrpro/

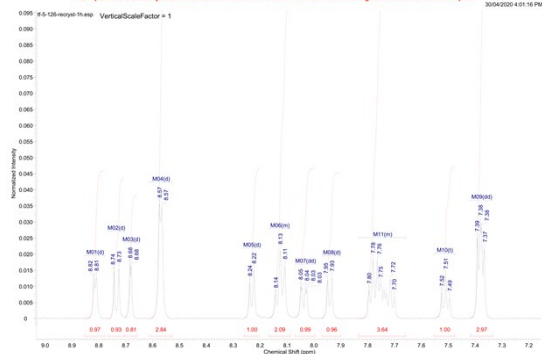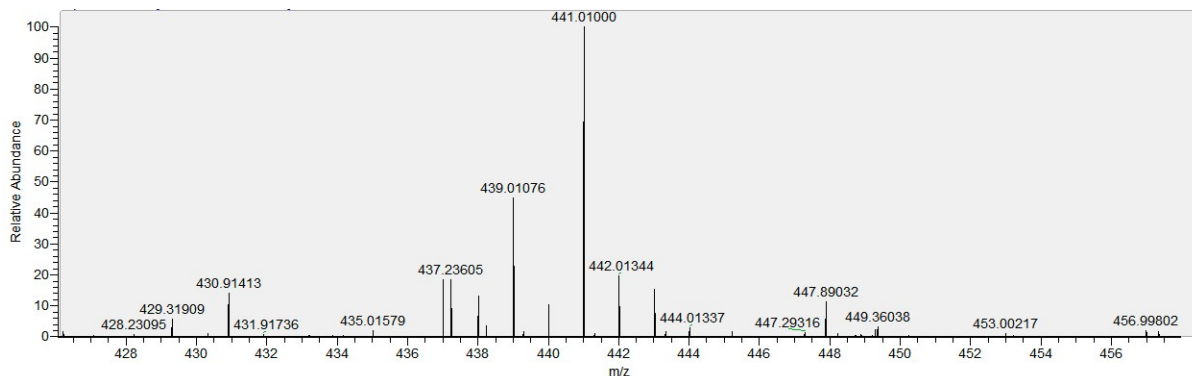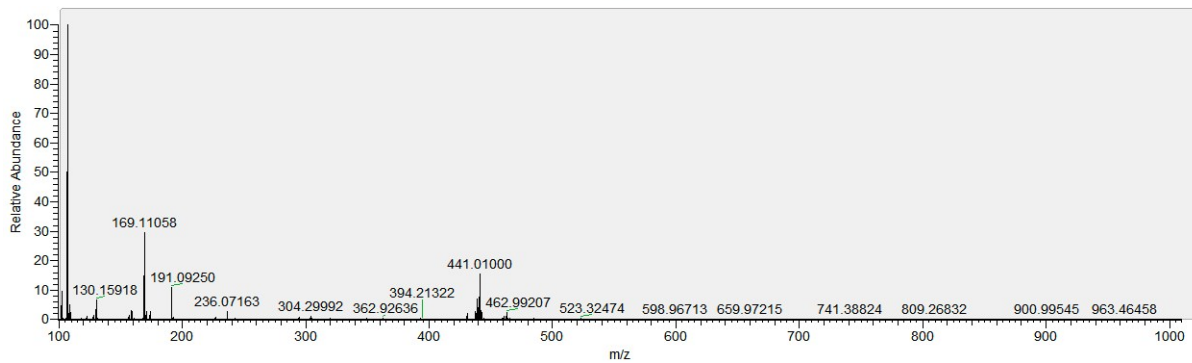

SUPP-Figure 1.

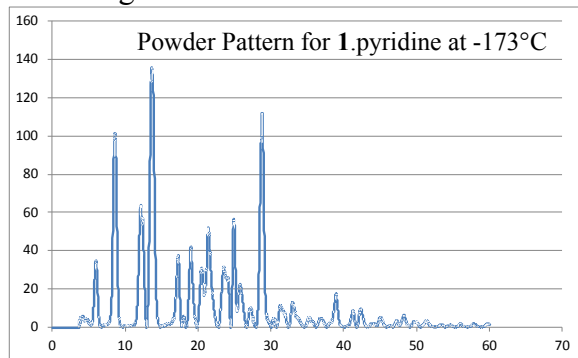

SUPP-Figure 2.

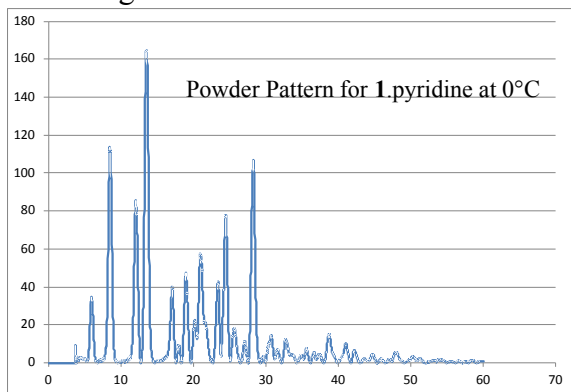

SUPP-Figure 3.

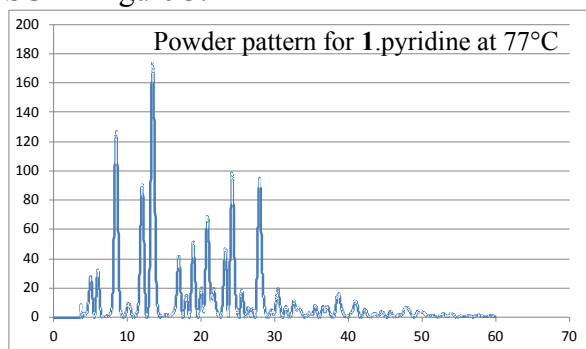

SUPP-Figure 4.

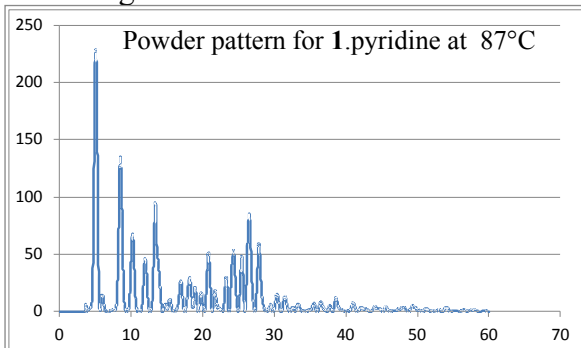

SUPP-Figure 5.

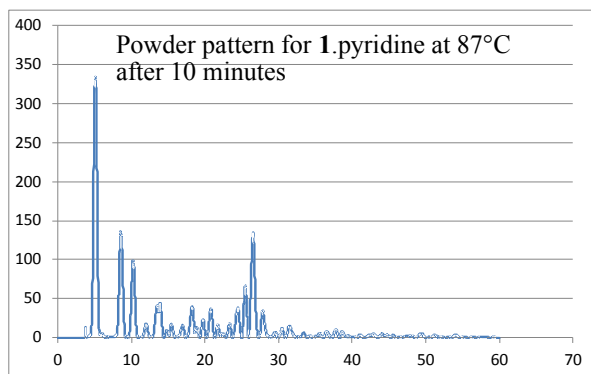

SUPP Figure 6.

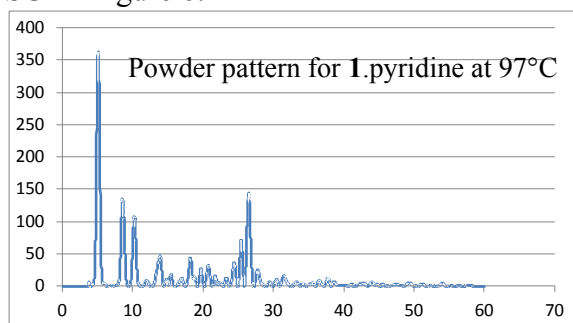

SUPP-Figure 7.

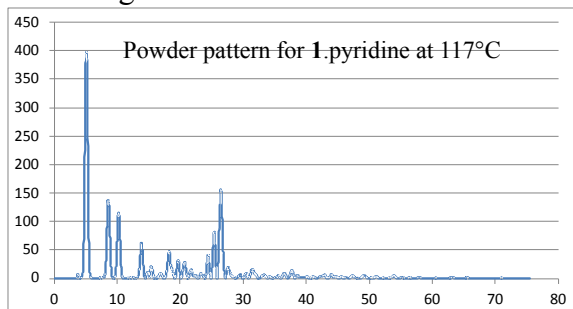

SUPP-Figure 8.

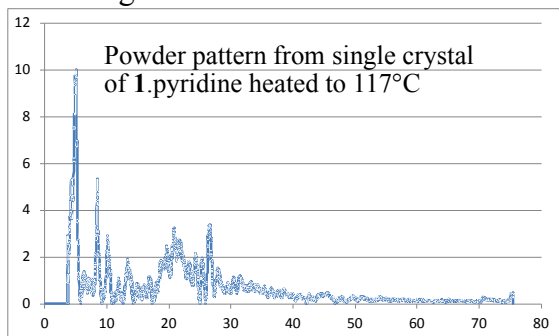

SUPP Figure 9

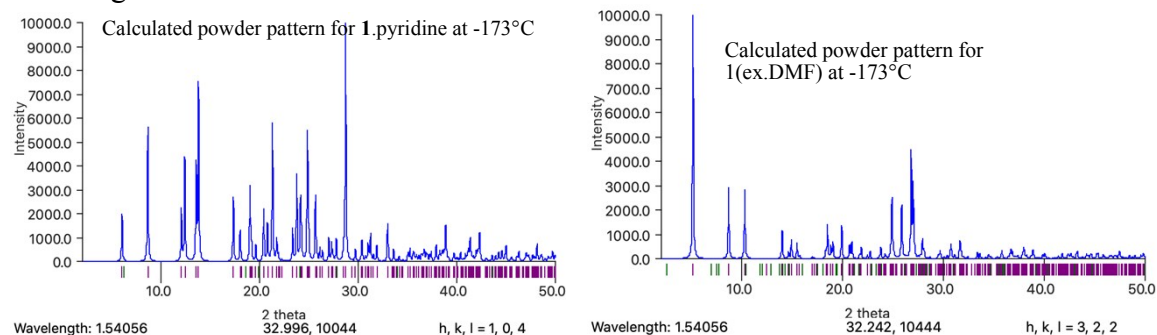

SUPP-Figure 10 Single crystal of **1**.Pyridine heated to 90°C. The faint powder rings were shown to be dues to formation of **1**(ex.DMF). See SUPP-Figure 8 for complete transformation at 113°C

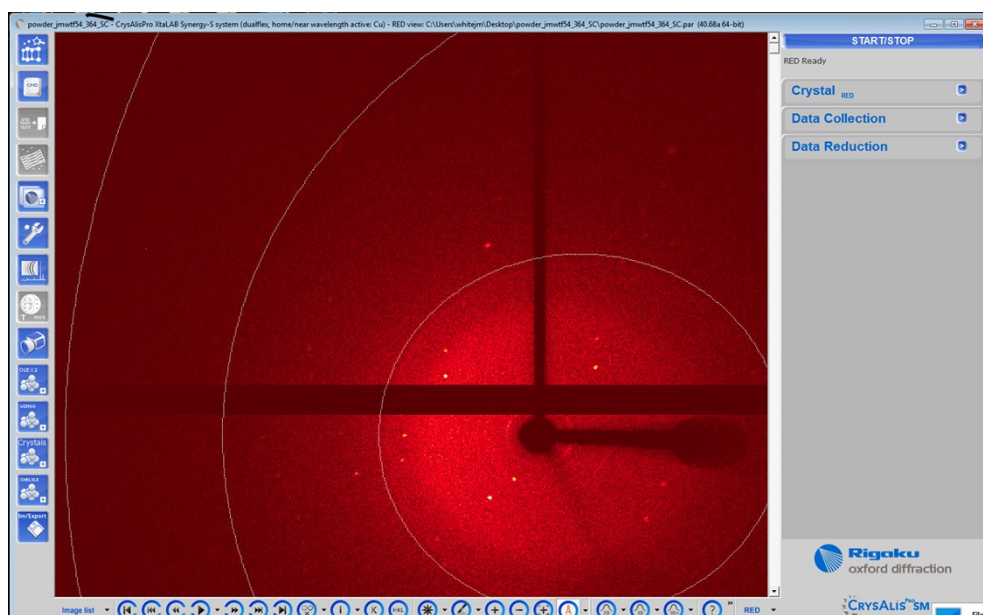

Supplement: d0ce00662a1.pdf [file d0ce00662a1.pdf]
